# Supplementary material for: Detailed flow, hydrometeor and lightning characteristics of an isolated thunderstorm during COPS
Source: Copernicus journal article supplement (doi:10.5194/acp-12-6679-2012), 2012-08-01
Supplement: Supplementary file 2 [file acp-12-6679-2012-supplement.zip]

Archive with 23 entries (23 files):
- Schmidt-etal-ACPD-Guide2ElecSupple.pdf
- 4levels-rad-mod/4levels-rad-mod_1415.jpg
- 4levels-rad-mod/4levels-rad-mod_1420.jpg
- 4levels-rad-mod/4levels-rad-mod_1425.jpg
- 4levels-rad-mod/4levels-rad-mod_1430.jpg
- 4levels-rad-mod/4levels-rad-mod_1435.jpg
- 4levels-rad-mod/4levels-rad-mod_1440.jpg
- 4levels-rad-mod/4levels-rad-mod_1445.jpg
- 4levels-rad-mod/4levels-rad-mod_1450.jpg
- 4levels-rad-mod/4levels-rad-mod_1455.jpg
- 4levels-rad-mod/4levels-rad-mod_1500.jpg
- 4levels-rad-mod/4levels-rad-mod_1505.jpg
- 4levels-rad-mod/4levels-rad-mod_1510.jpg
- 4levels-rad-mod/4levels-rad-mod_1515.jpg
- 4levels-rad-mod/4levels-rad-mod_1520.jpg
- 4levels-rad-mod/4levels-rad-mod_1525.jpg
- 4levels-rad-mod/4levels-rad-mod_1530.jpg
- 4levels-rad-mod/4levels-rad-mod_1535.jpg
- 4levels-rad-mod/4levels-rad-mod_1540.jpg
- movie1.mpg
- movie2.mpg
- movie3.mpg
- movie4.mpg
