# Supplementary figures and images for: Detailed flow, hydrometeor and lightning characteristics of an isolated thunderstorm during COPS
Source: Copernicus journal article supplement (doi:10.5194/acp-12-6679-2012), 2012-08-01

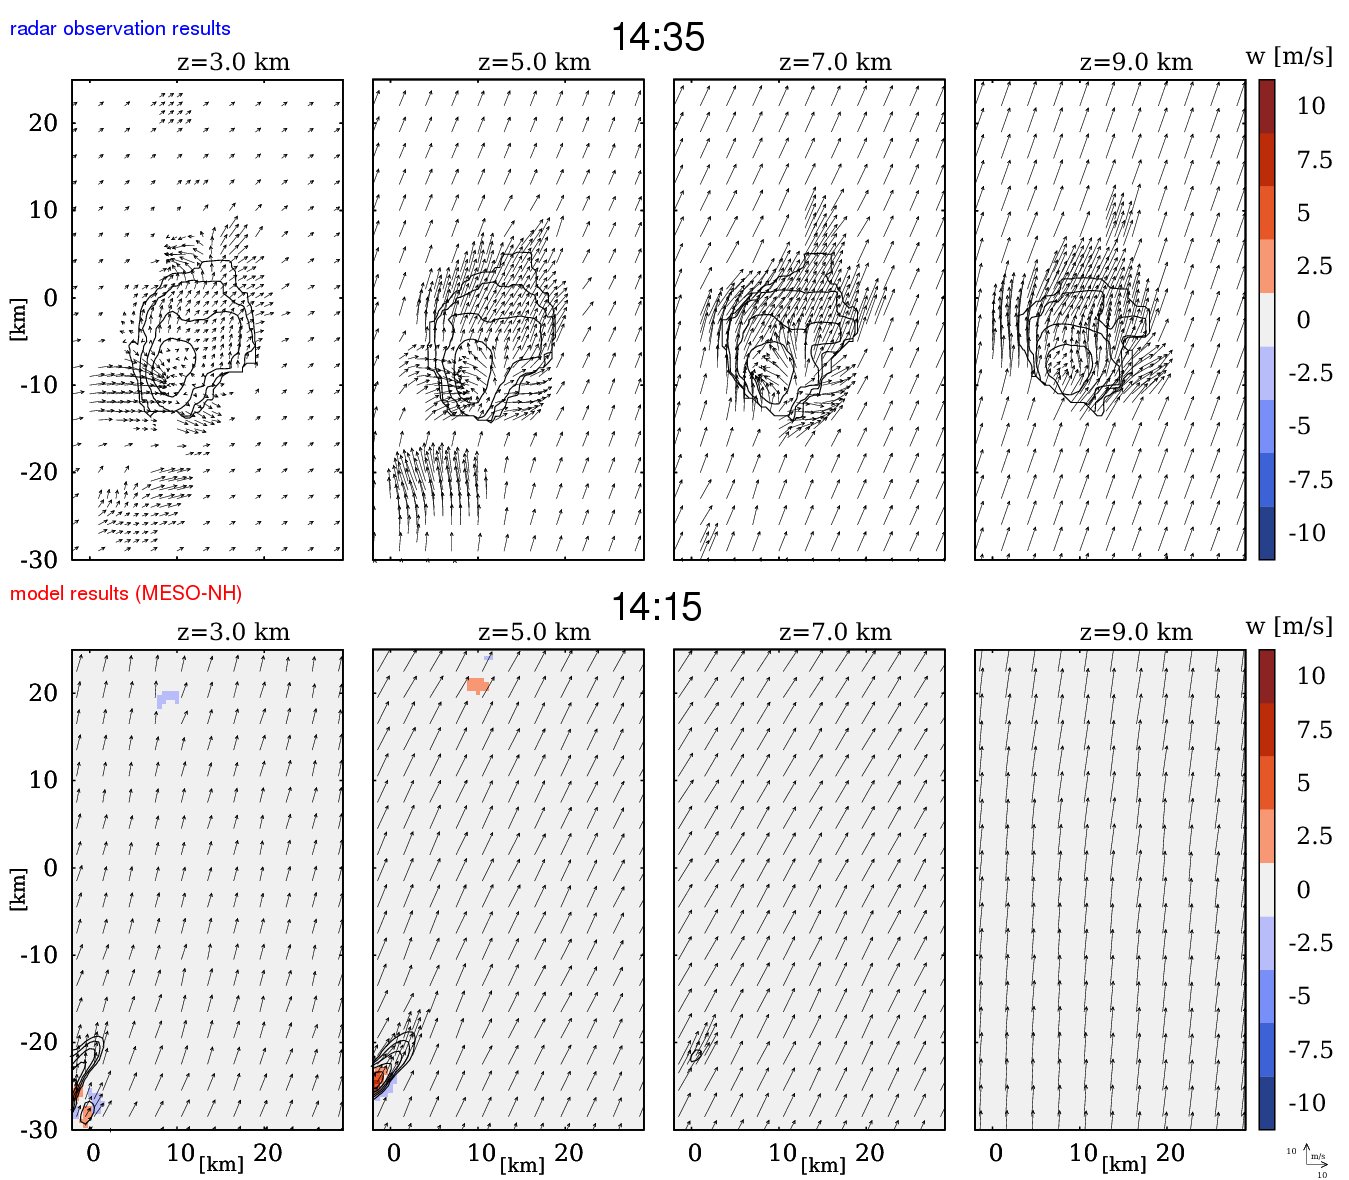

Supplement: Supplementary file 2 [file acp-12-6679-2012-supplement.zip › 4levels-rad-mod/4levels-rad-mod_1415.jpg]

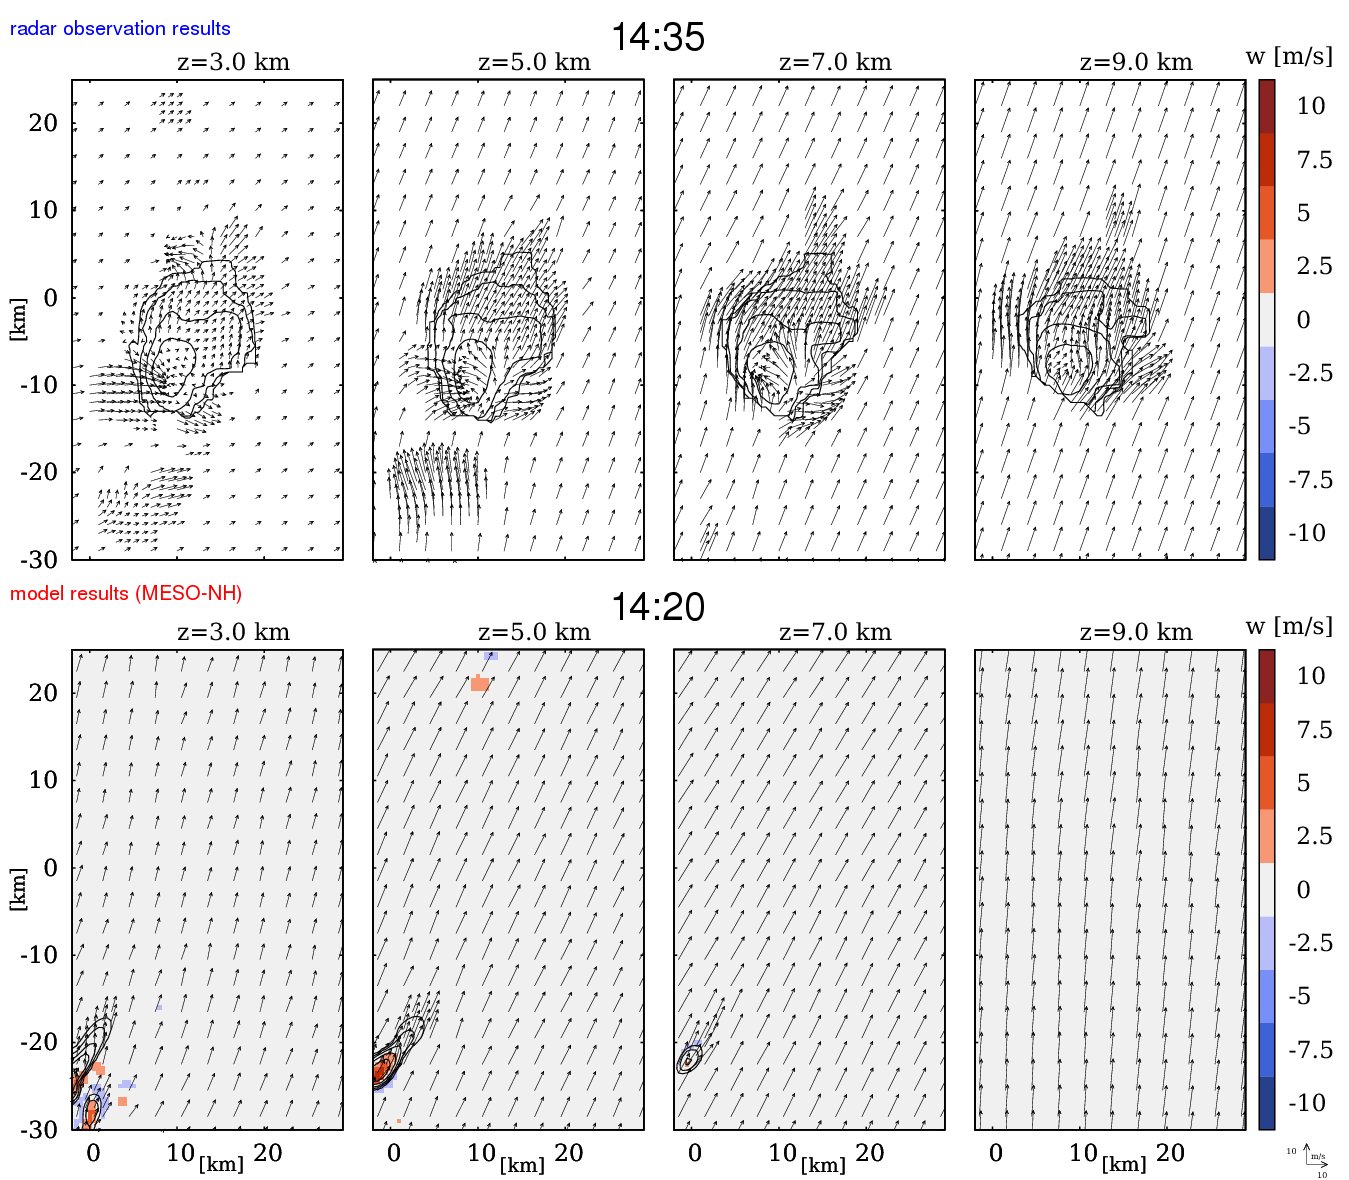

Supplement: Supplementary file 2 [file acp-12-6679-2012-supplement.zip › 4levels-rad-mod/4levels-rad-mod_1420.jpg]

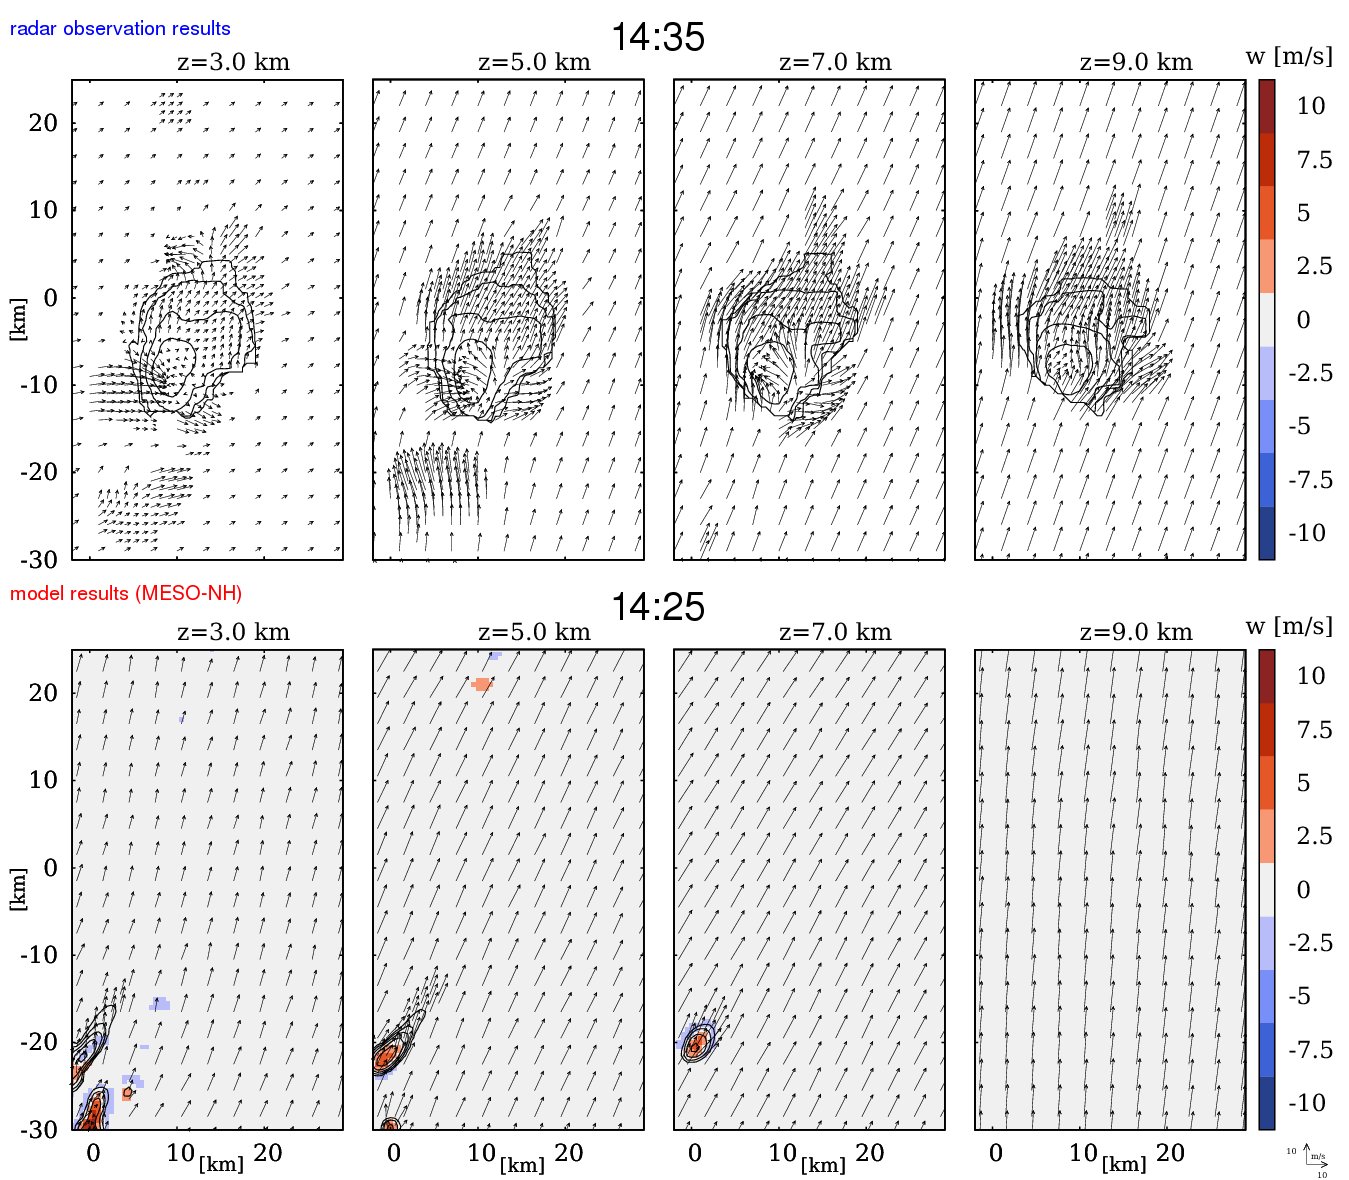

Supplement: Supplementary file 2 [file acp-12-6679-2012-supplement.zip › 4levels-rad-mod/4levels-rad-mod_1425.jpg]

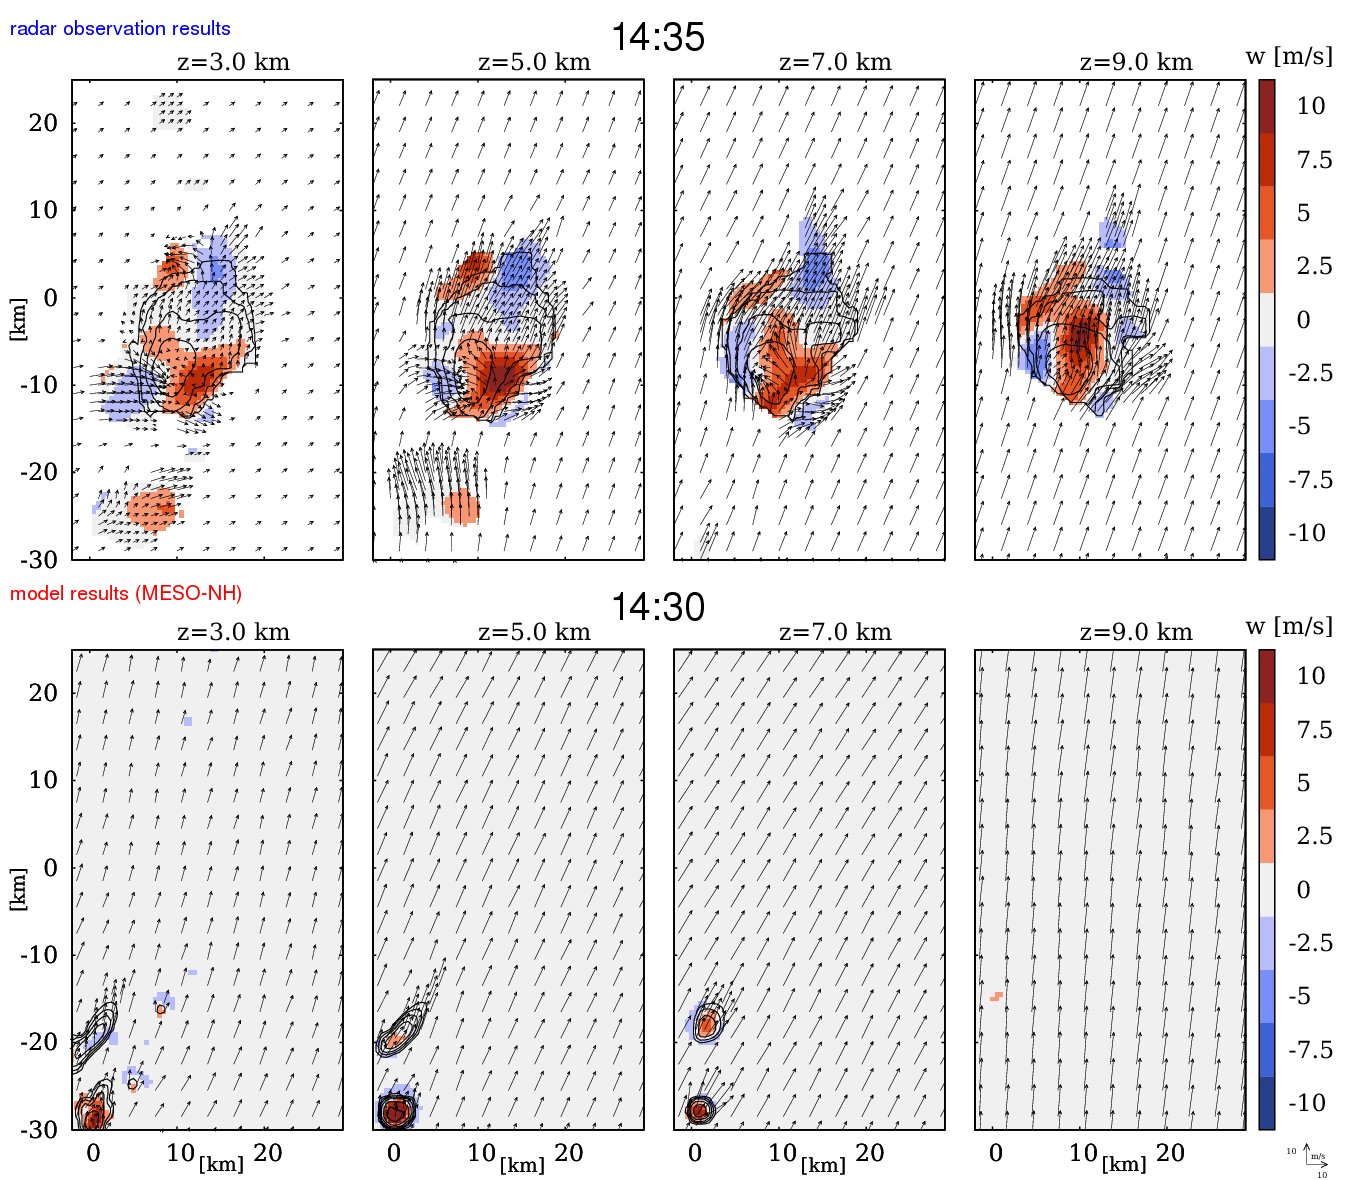

Supplement: Supplementary file 2 [file acp-12-6679-2012-supplement.zip › 4levels-rad-mod/4levels-rad-mod_1430.jpg]

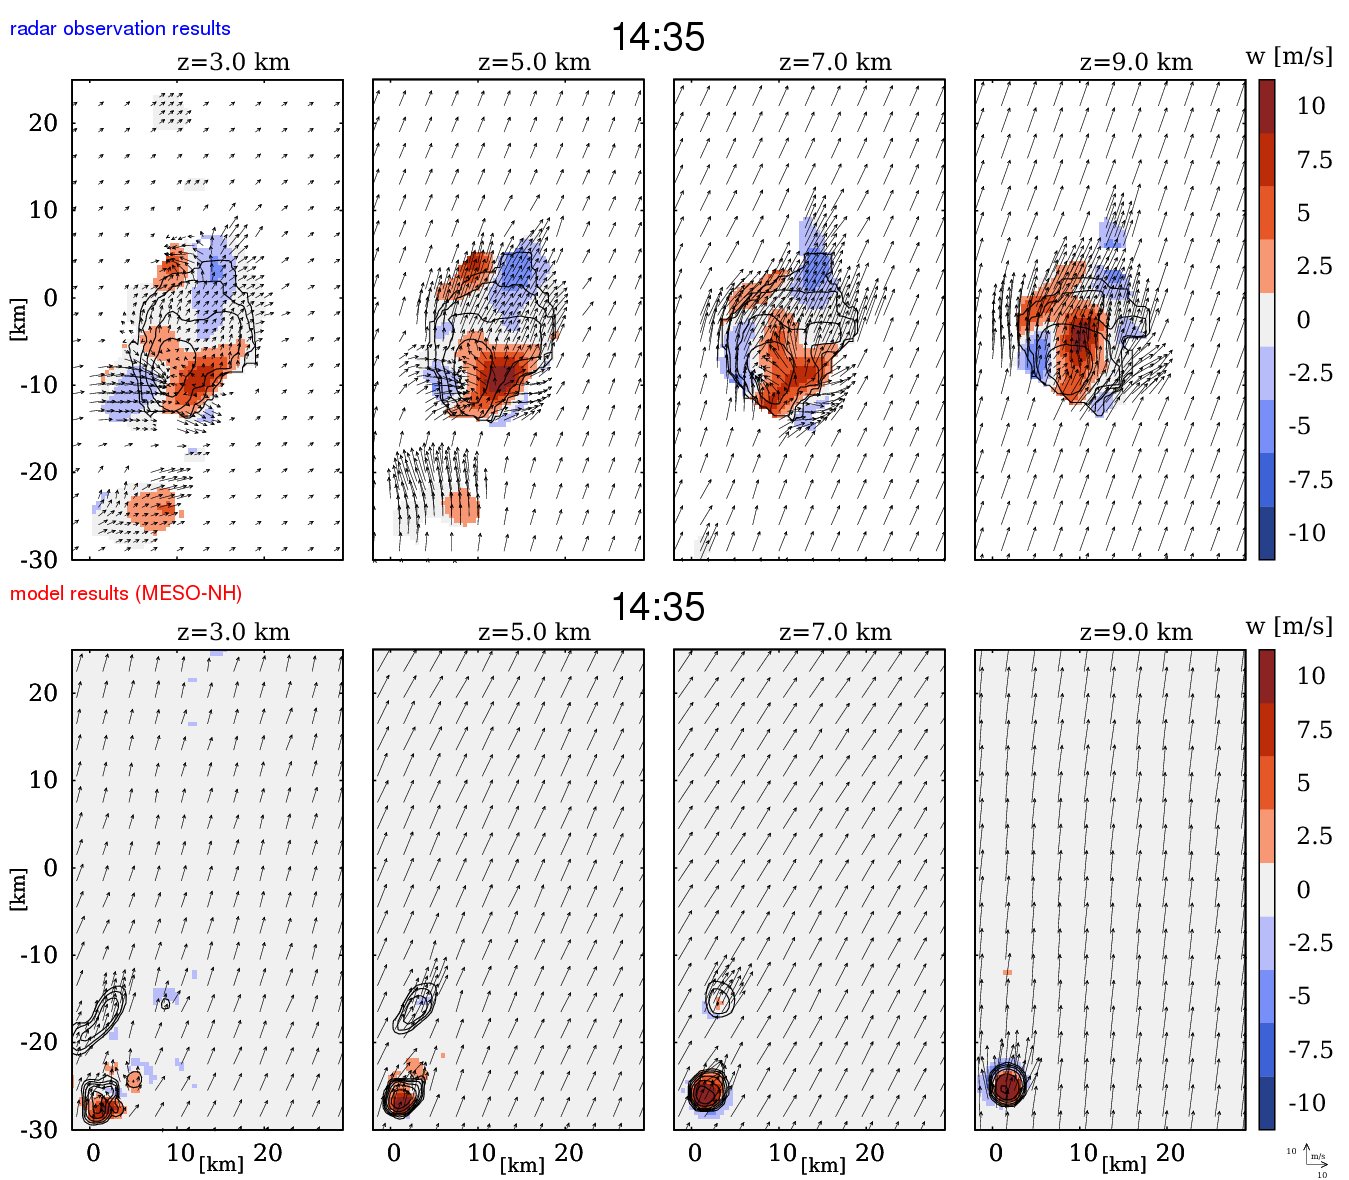

Supplement: Supplementary file 2 [file acp-12-6679-2012-supplement.zip › 4levels-rad-mod/4levels-rad-mod_1435.jpg]

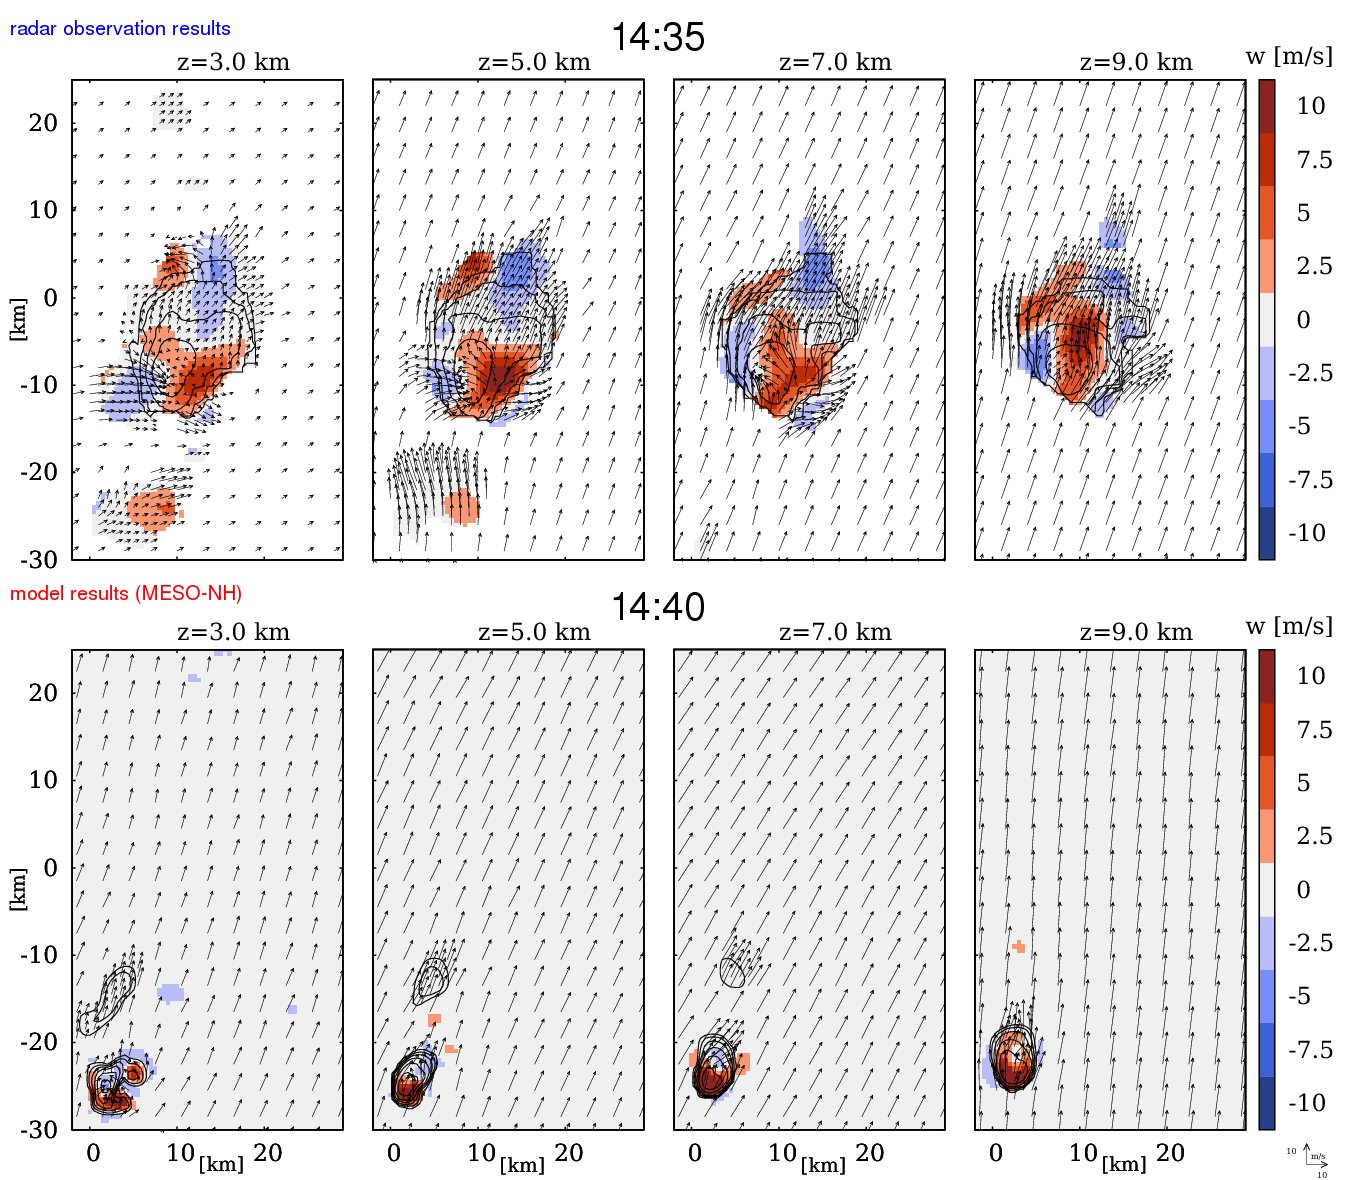

Supplement: Supplementary file 2 [file acp-12-6679-2012-supplement.zip › 4levels-rad-mod/4levels-rad-mod_1440.jpg]

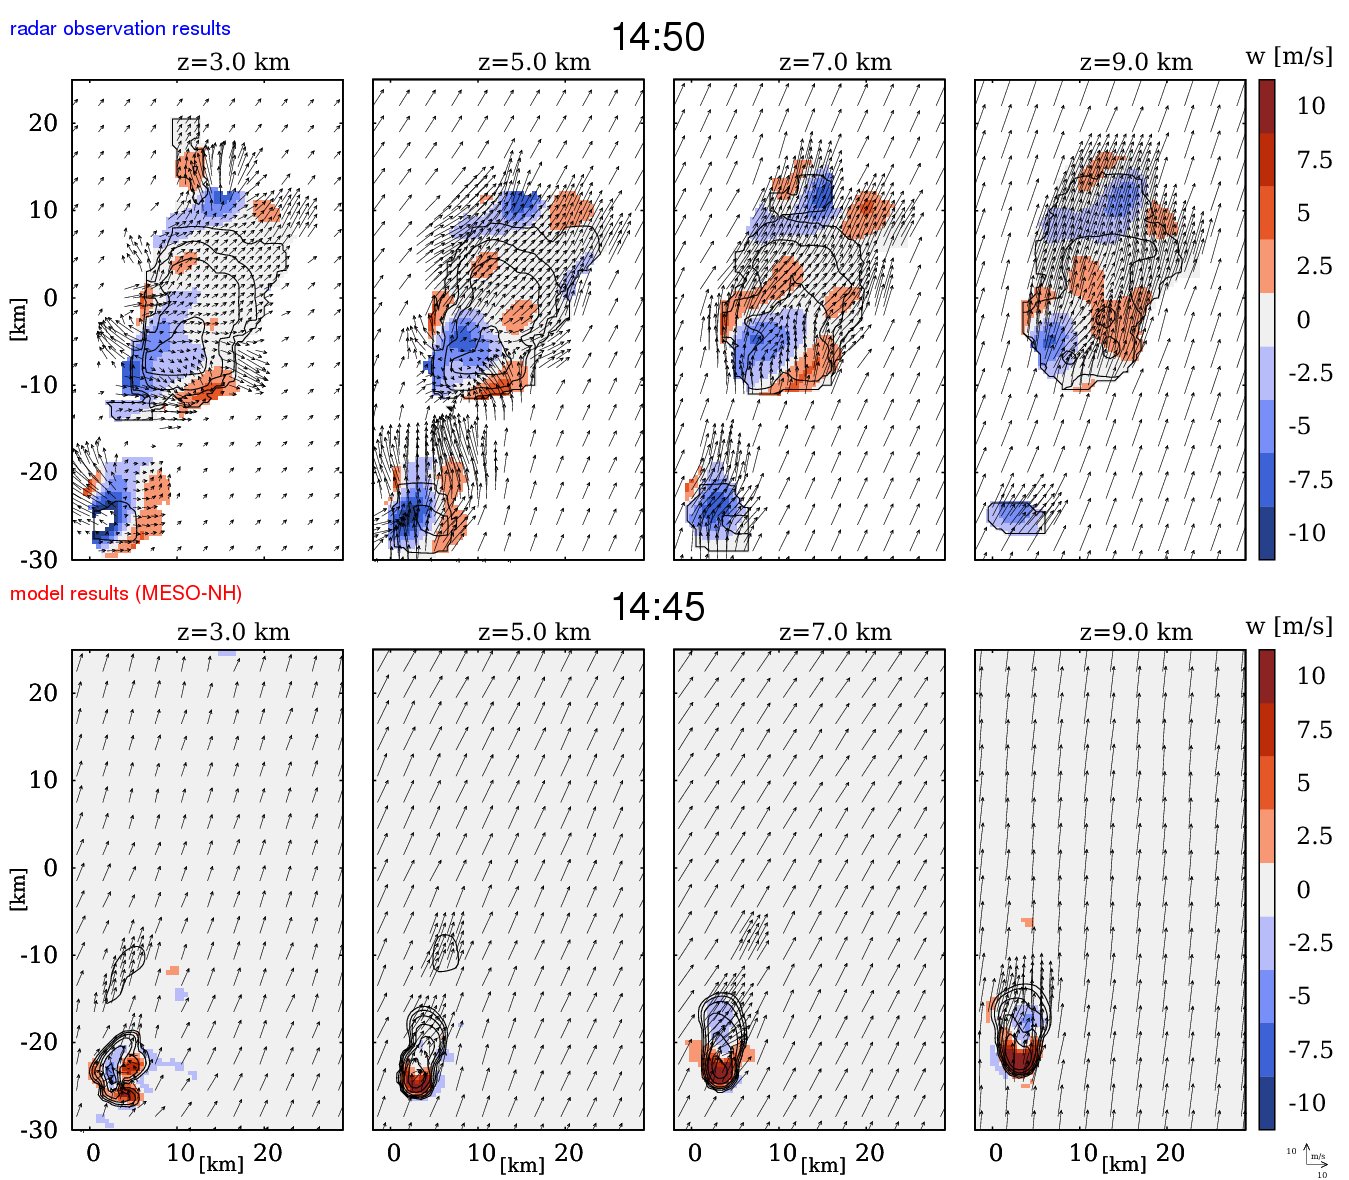

Supplement: Supplementary file 2 [file acp-12-6679-2012-supplement.zip › 4levels-rad-mod/4levels-rad-mod_1445.jpg]

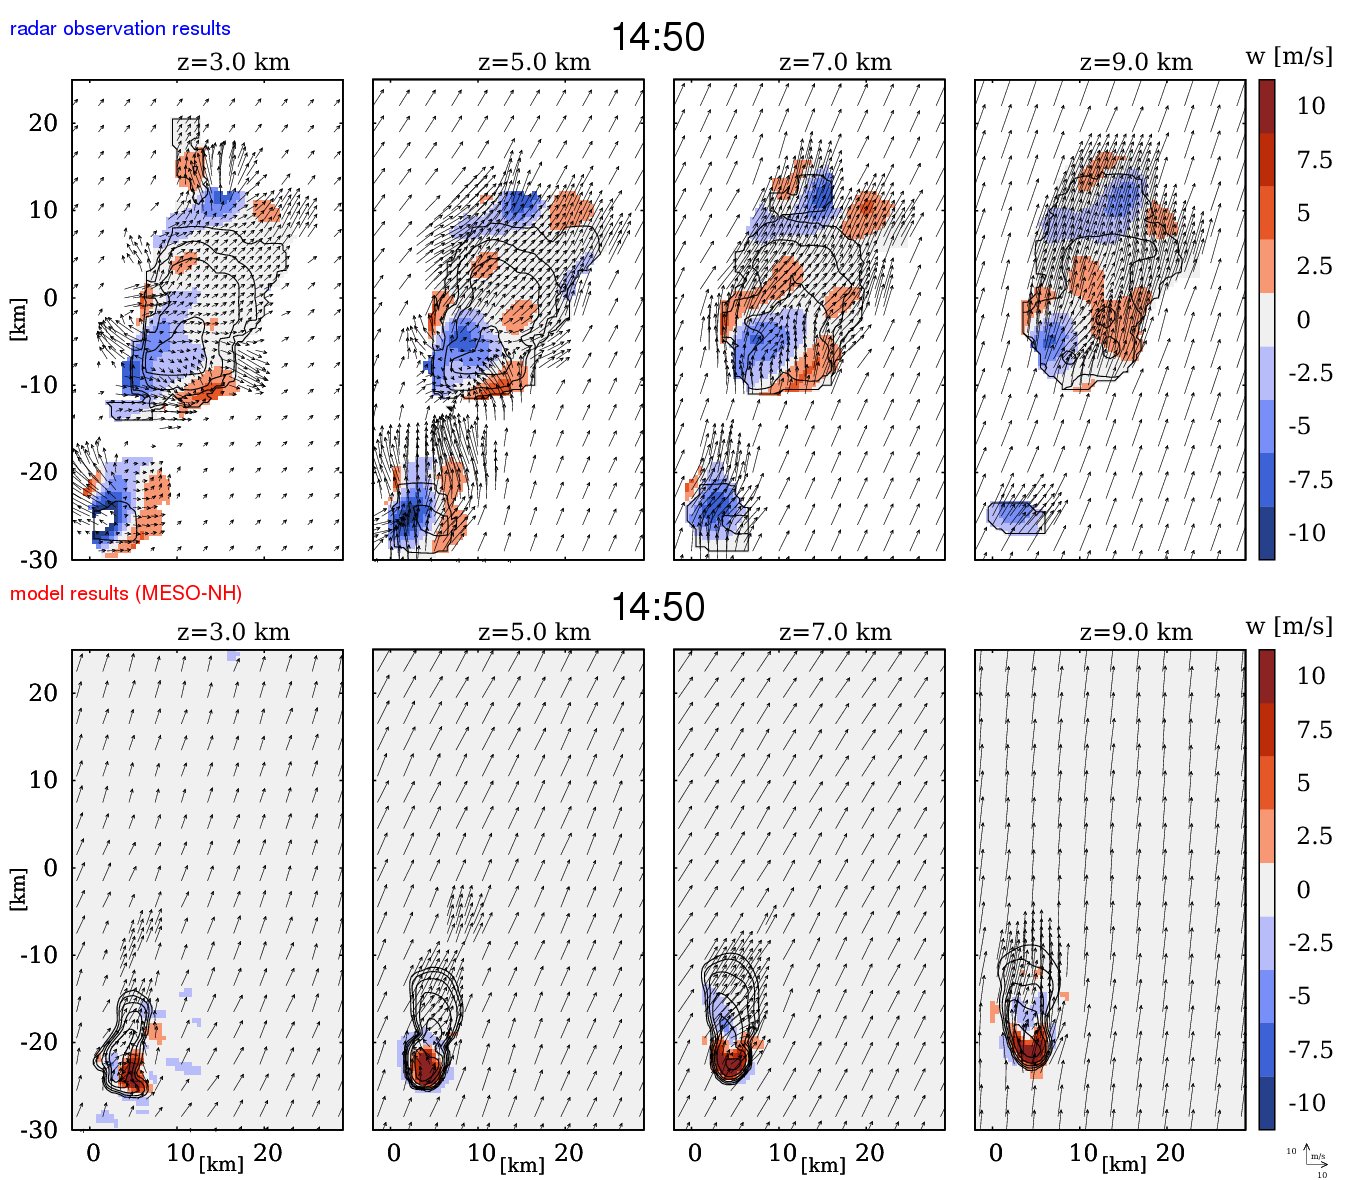

Supplement: Supplementary file 2 [file acp-12-6679-2012-supplement.zip › 4levels-rad-mod/4levels-rad-mod_1450.jpg]

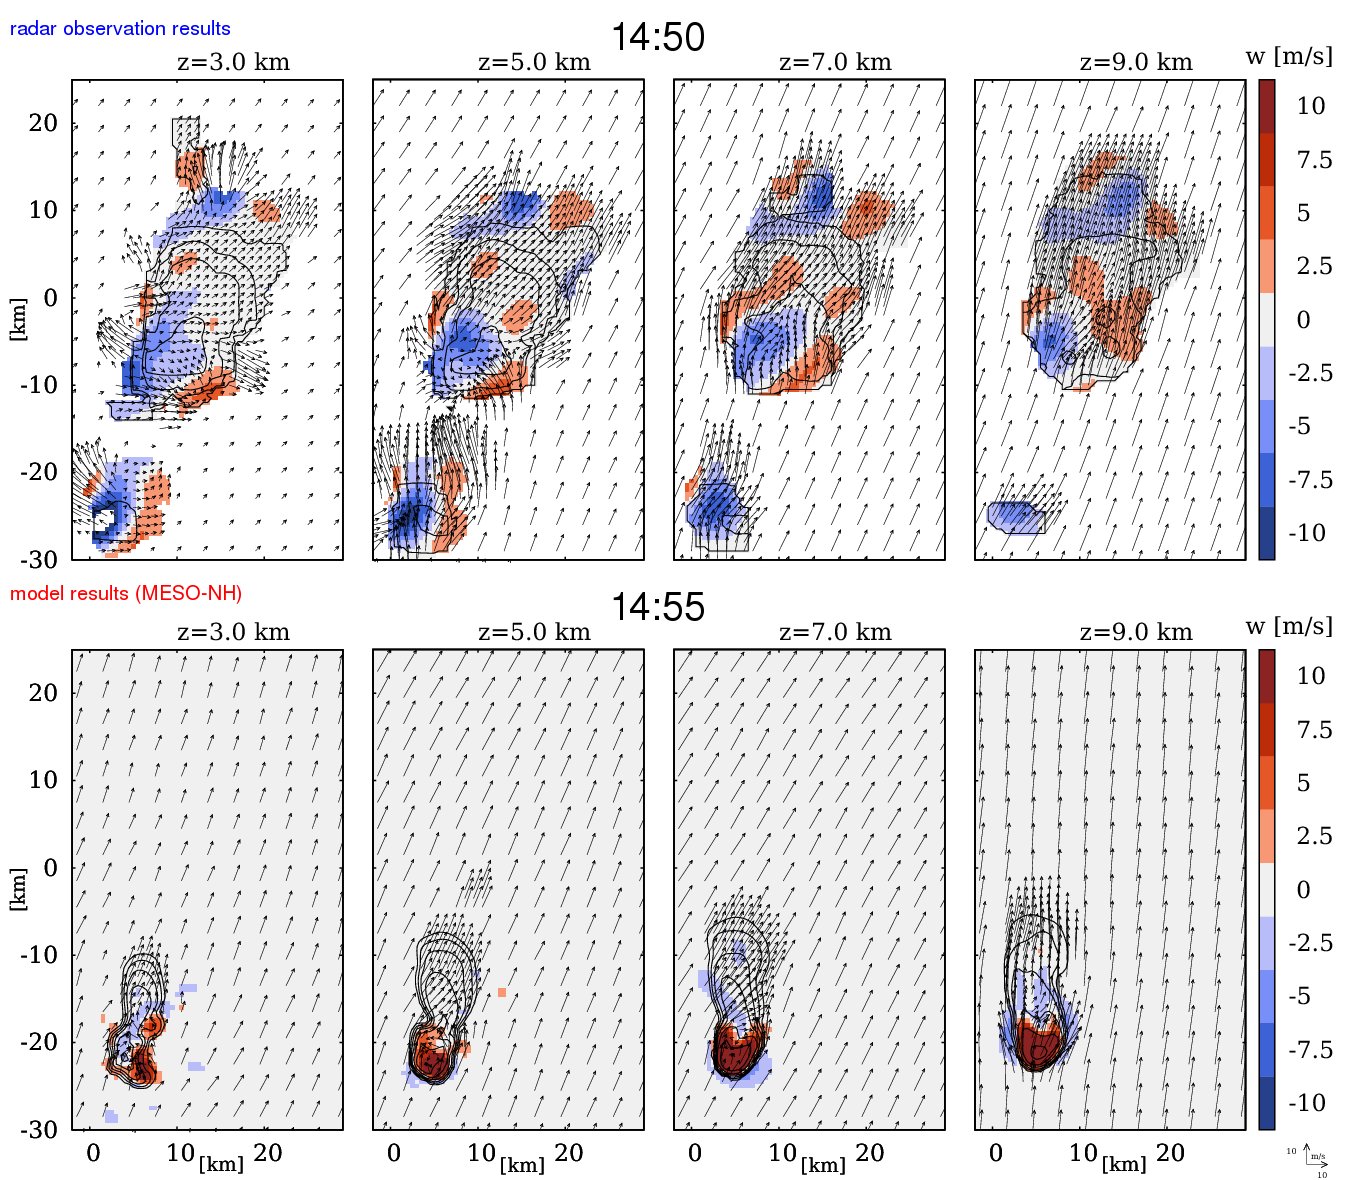

Supplement: Supplementary file 2 [file acp-12-6679-2012-supplement.zip › 4levels-rad-mod/4levels-rad-mod_1455.jpg]

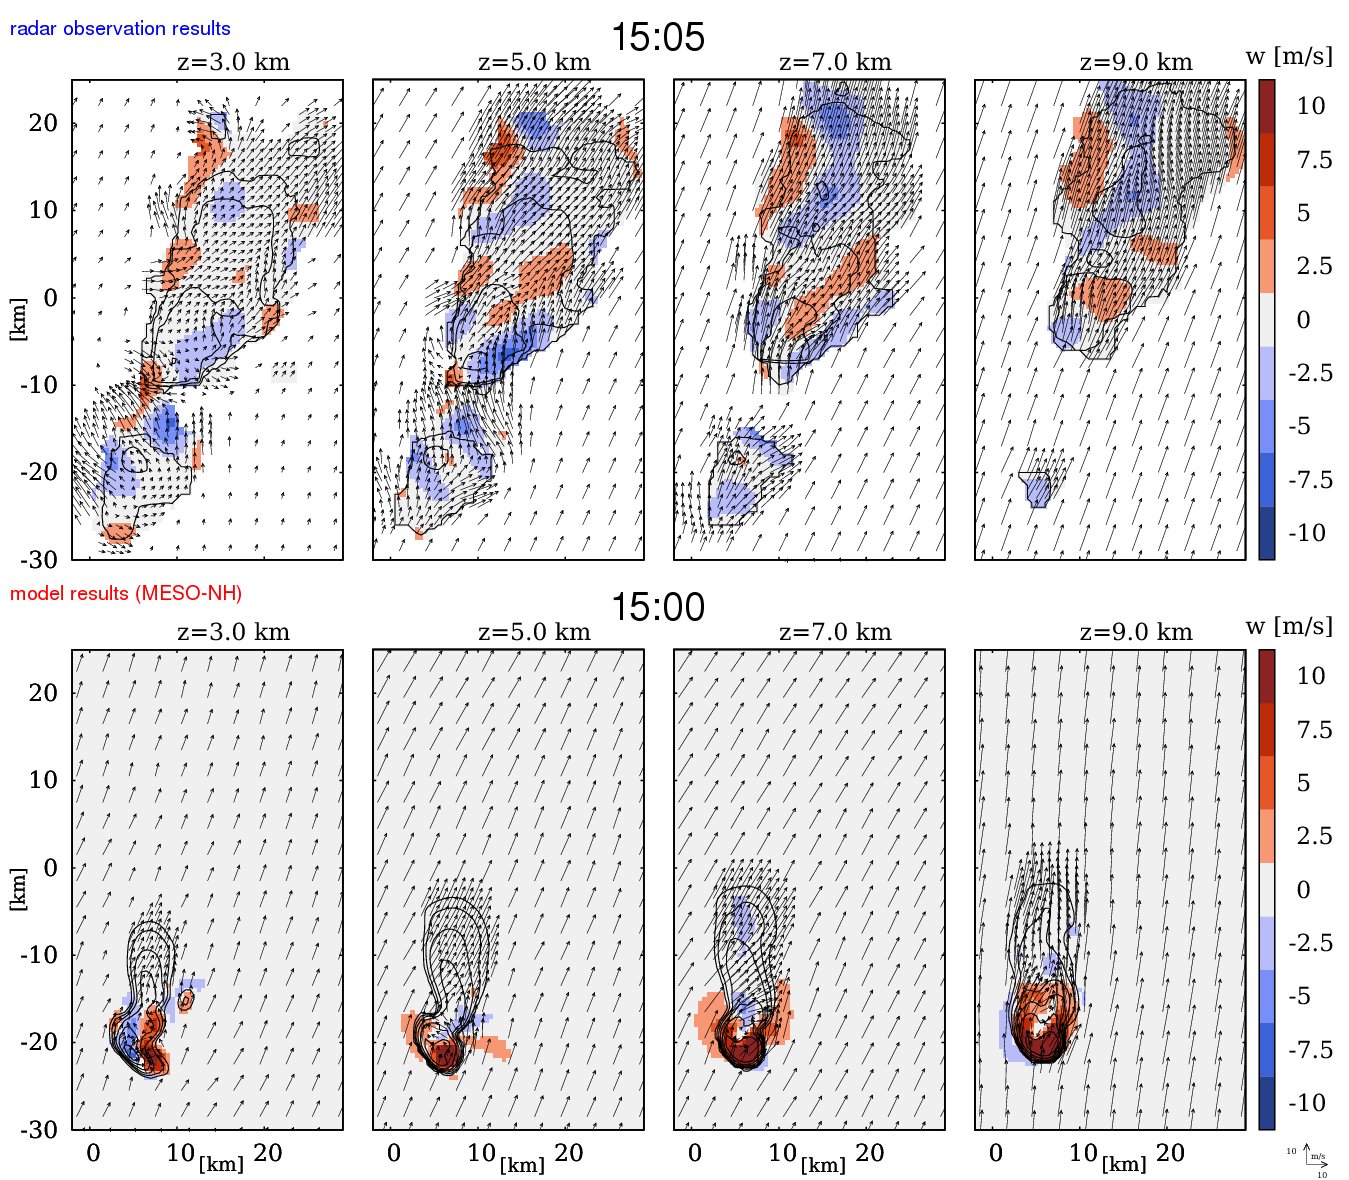

Supplement: Supplementary file 2 [file acp-12-6679-2012-supplement.zip › 4levels-rad-mod/4levels-rad-mod_1500.jpg]

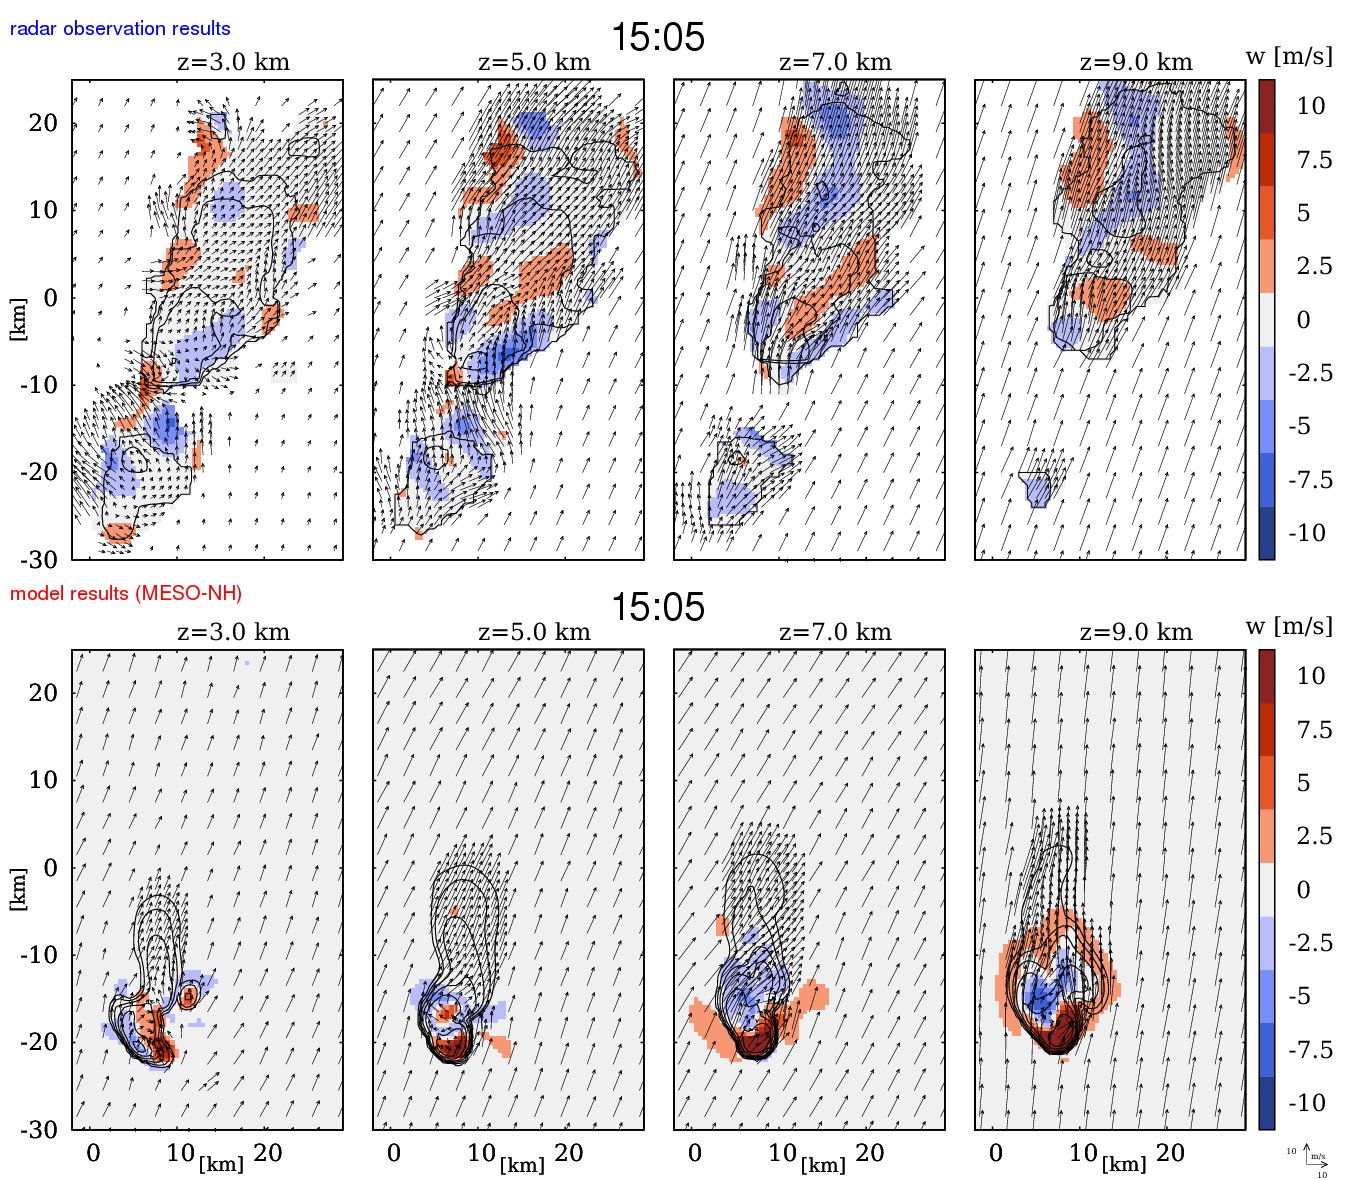

Supplement: Supplementary file 2 [file acp-12-6679-2012-supplement.zip › 4levels-rad-mod/4levels-rad-mod_1505.jpg]

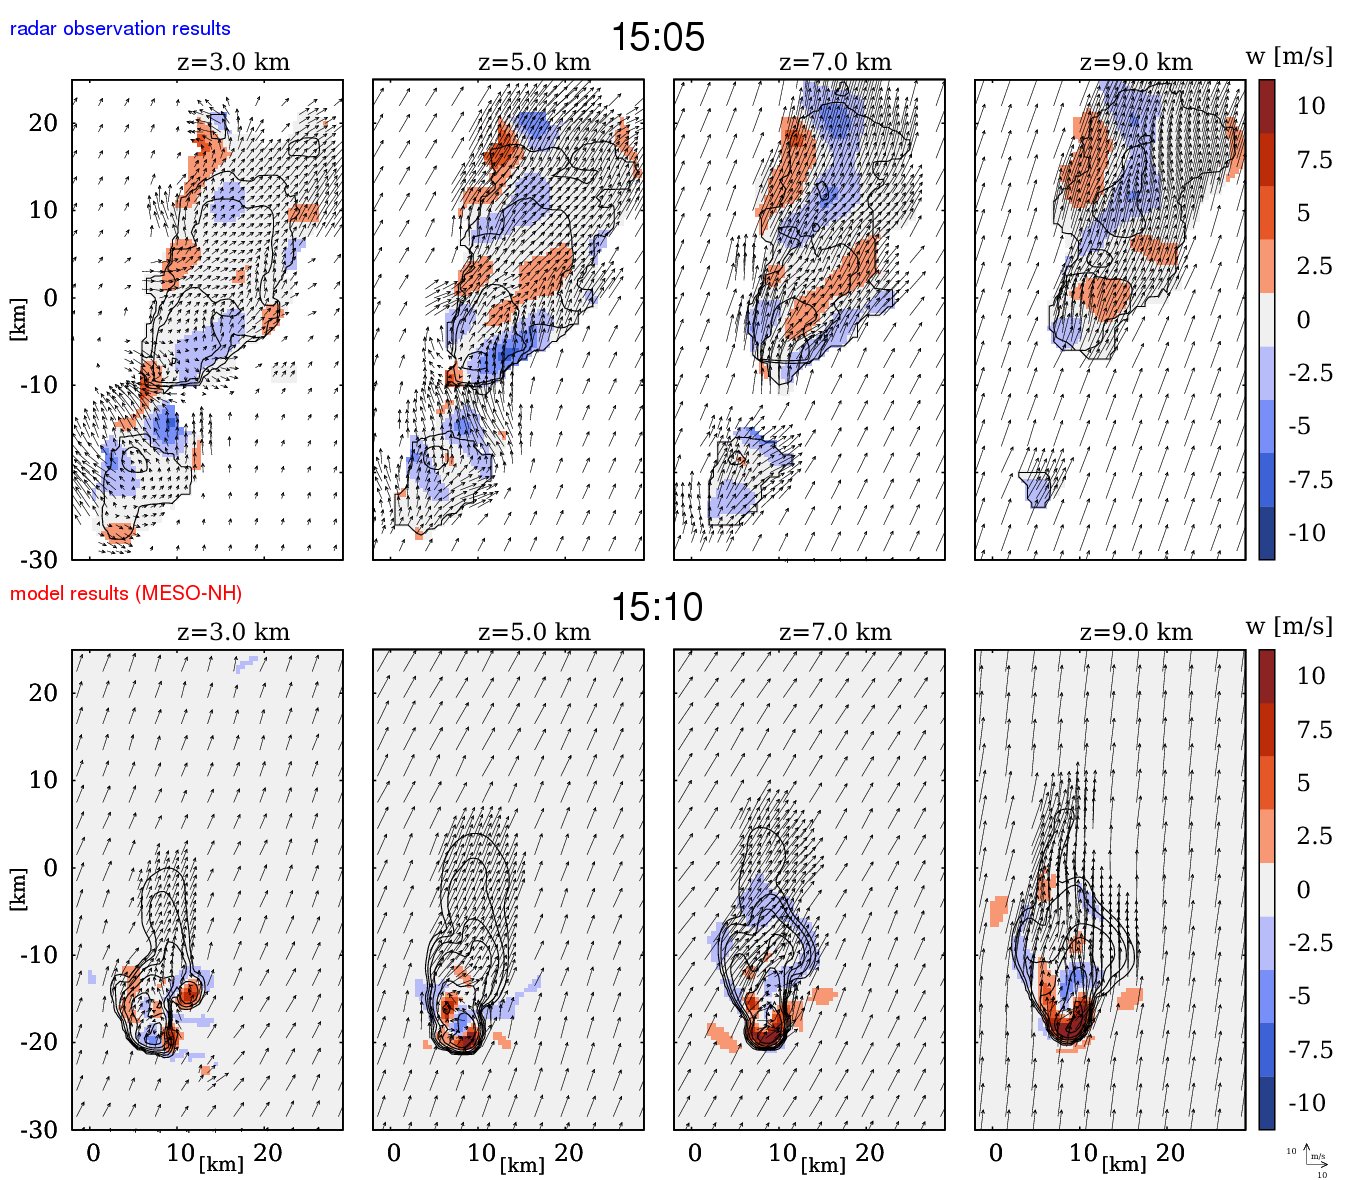

Supplement: Supplementary file 2 [file acp-12-6679-2012-supplement.zip › 4levels-rad-mod/4levels-rad-mod_1510.jpg]

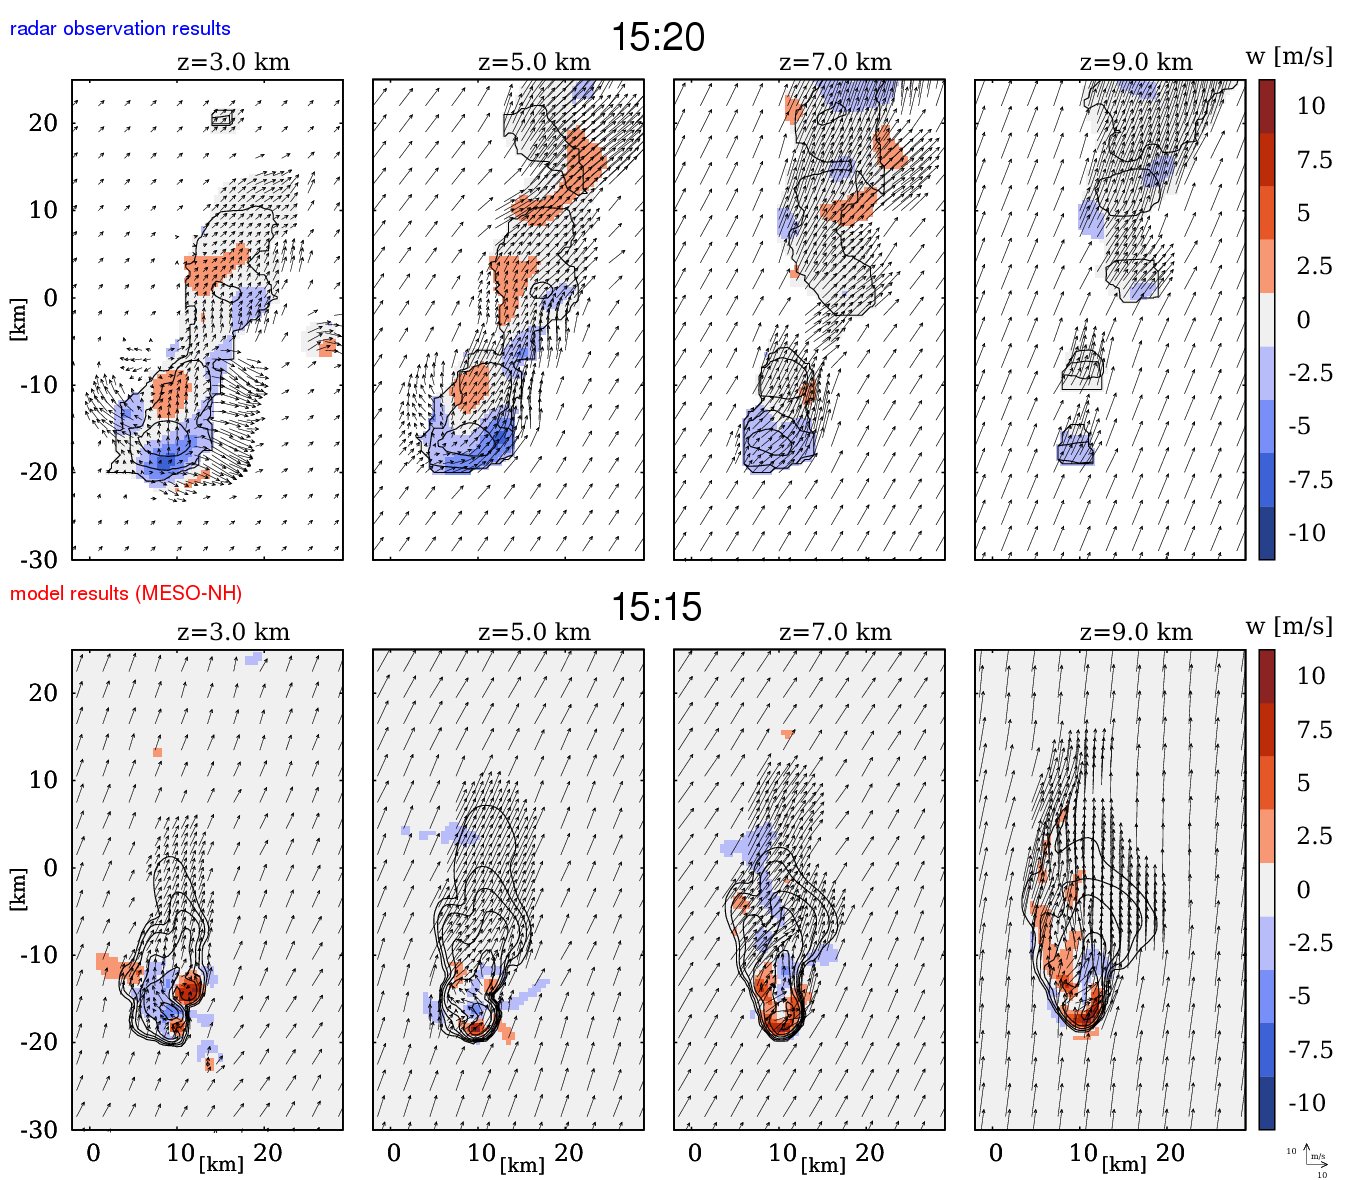

Supplement: Supplementary file 2 [file acp-12-6679-2012-supplement.zip › 4levels-rad-mod/4levels-rad-mod_1515.jpg]

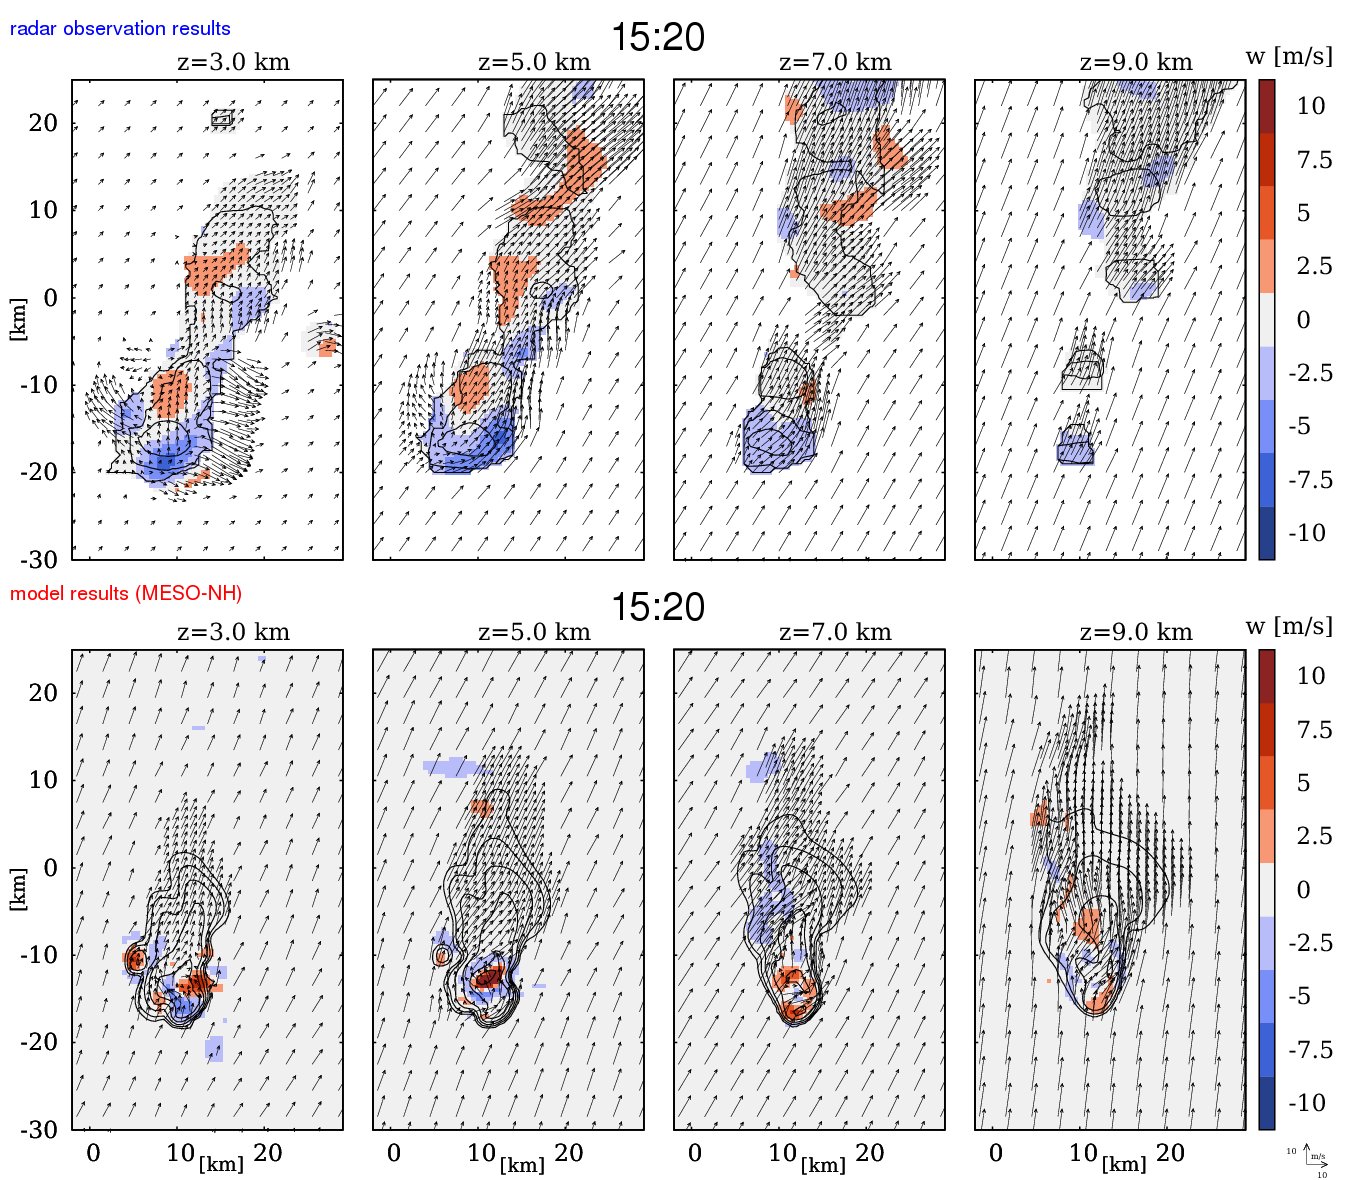

Supplement: Supplementary file 2 [file acp-12-6679-2012-supplement.zip › 4levels-rad-mod/4levels-rad-mod_1520.jpg]

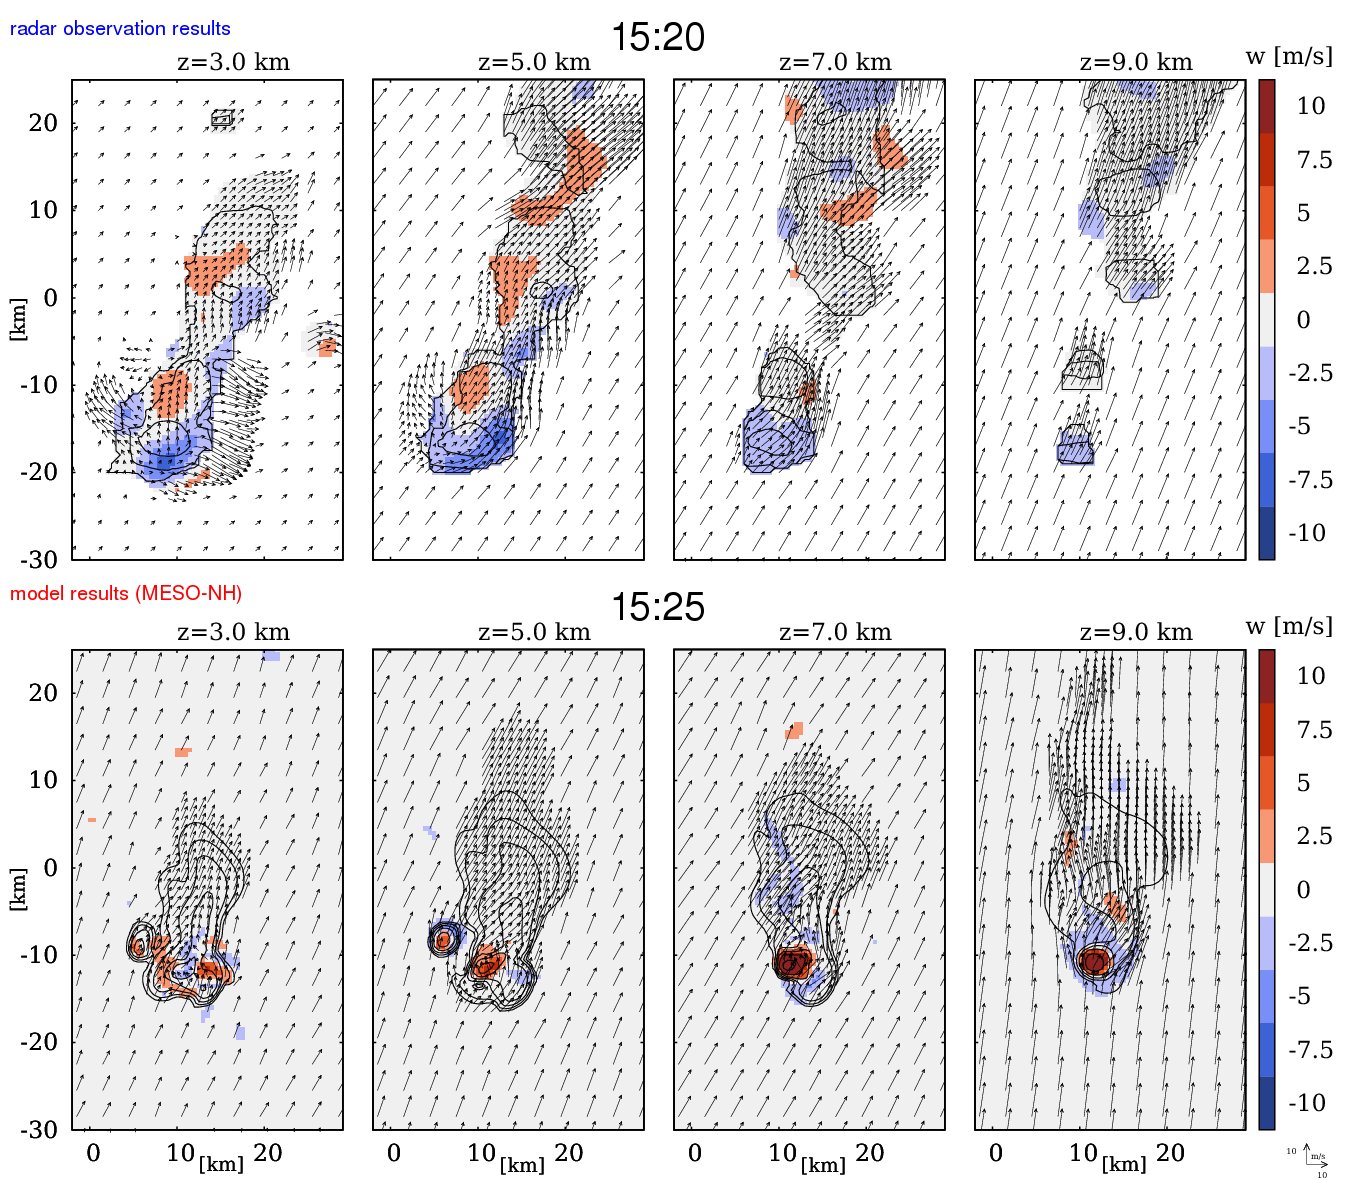

Supplement: Supplementary file 2 [file acp-12-6679-2012-supplement.zip › 4levels-rad-mod/4levels-rad-mod_1525.jpg]

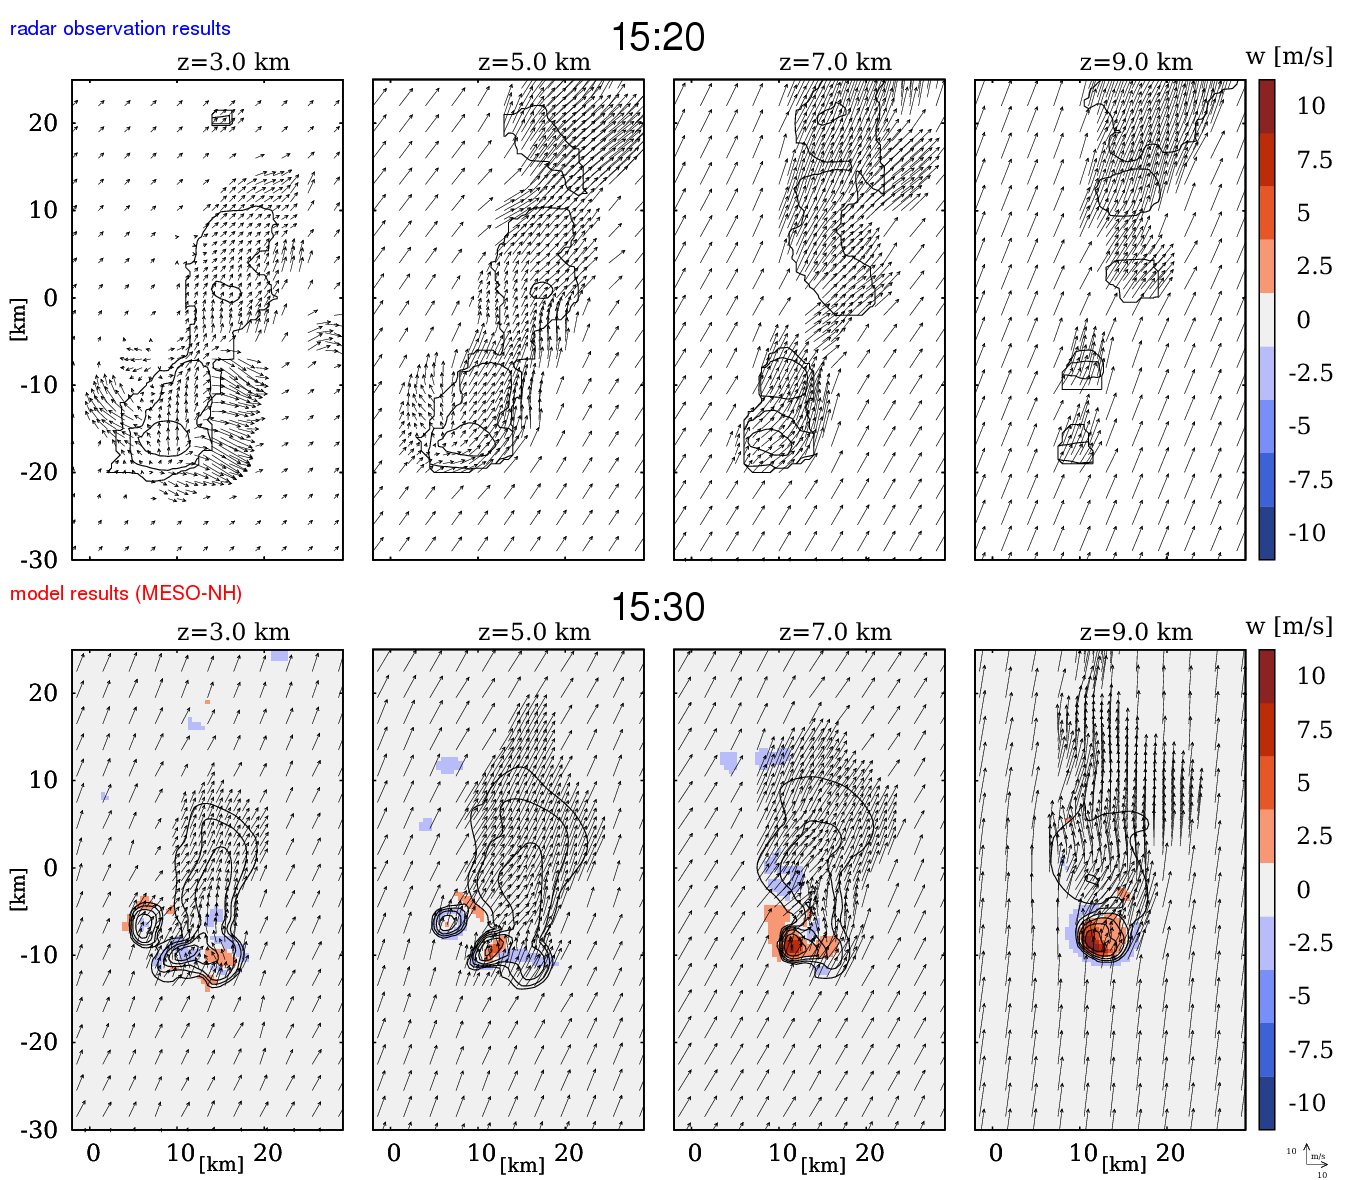

Supplement: Supplementary file 2 [file acp-12-6679-2012-supplement.zip › 4levels-rad-mod/4levels-rad-mod_1530.jpg]

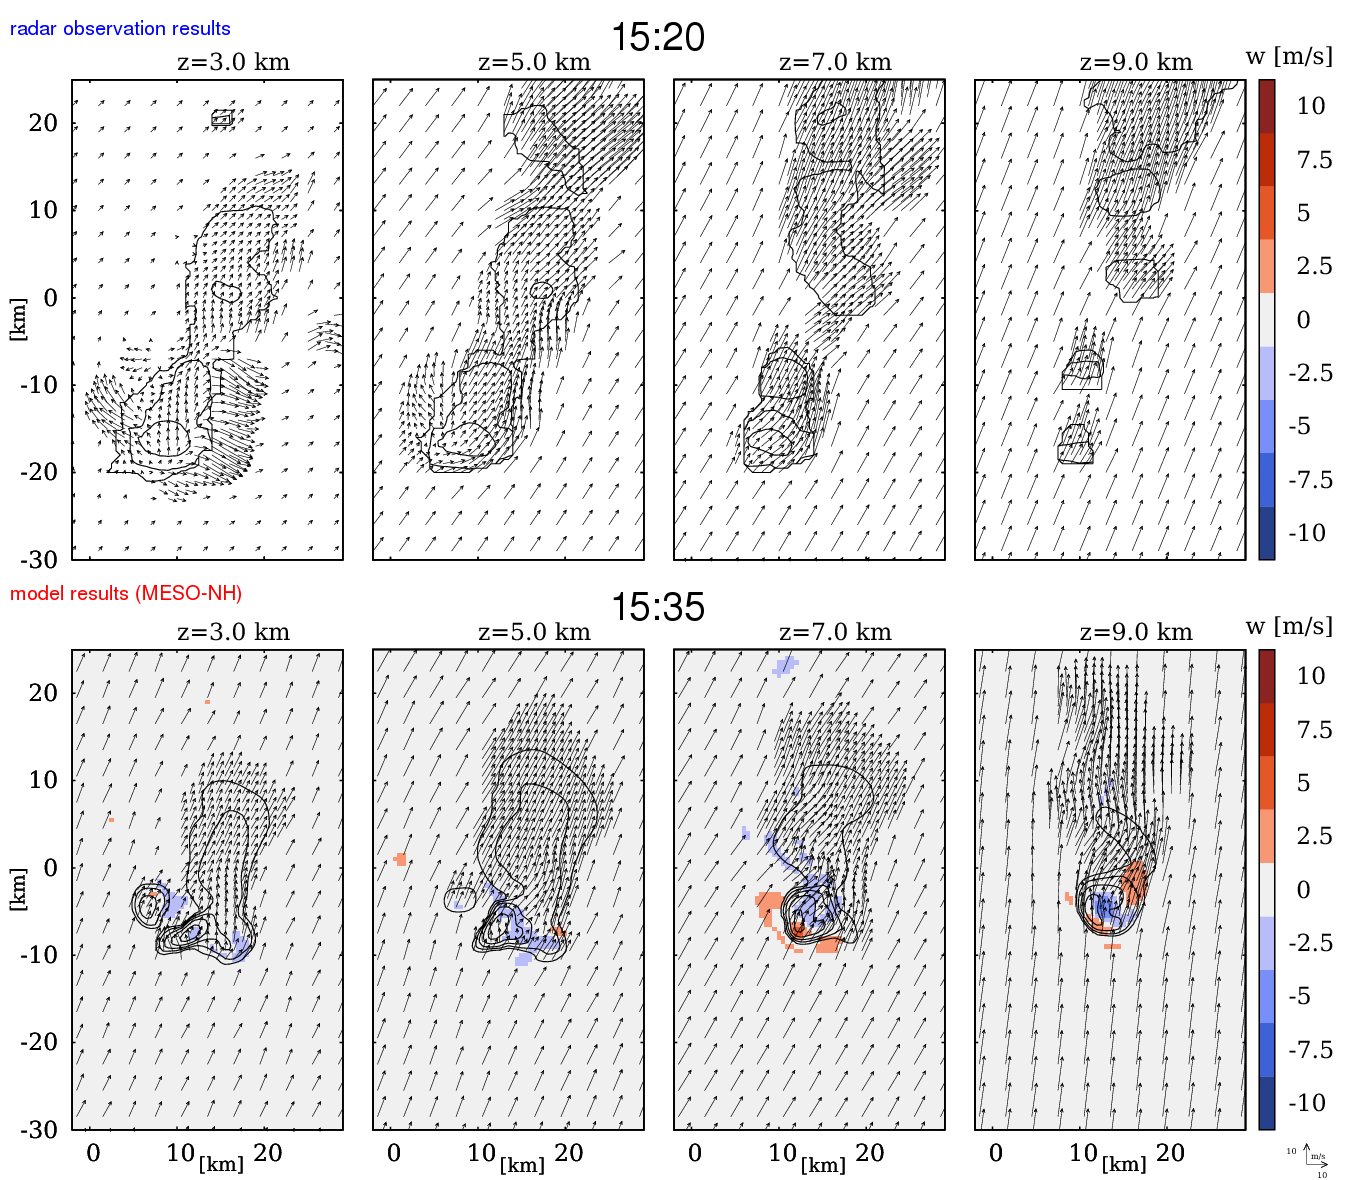

Supplement: Supplementary file 2 [file acp-12-6679-2012-supplement.zip › 4levels-rad-mod/4levels-rad-mod_1535.jpg]

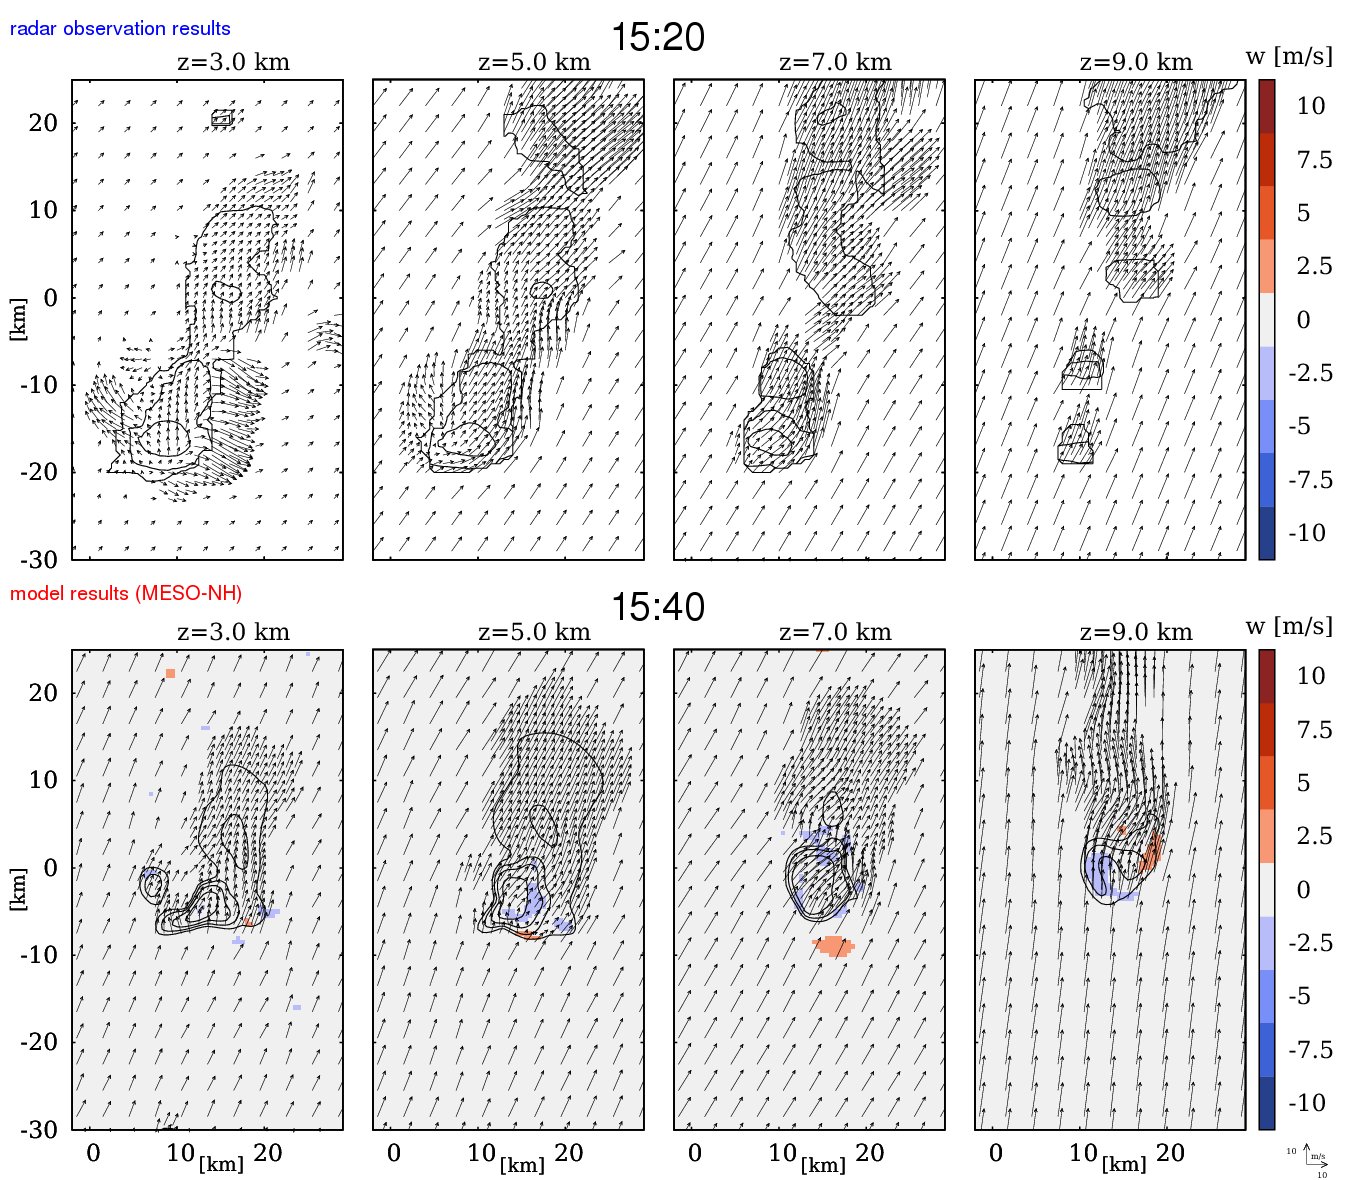

Supplement: Supplementary file 2 [file acp-12-6679-2012-supplement.zip › 4levels-rad-mod/4levels-rad-mod_1540.jpg]
